# Supplementary material for: Exogenous double‐stranded RNA inhibits the infection physiology of rust fungi to reduce symptoms in planta
Source: PubMed Central journal article supplement — Mol Plant Pathol. 2022 Dec 17;24(3):191–207. doi: 10.1111/mpp.13286 (PMC9923395; doi:10.1111/mpp.13286), 2022-12-17
Supplement: MPP-24-191-s001.pdf [file MPP-24-191-s001.pdf]

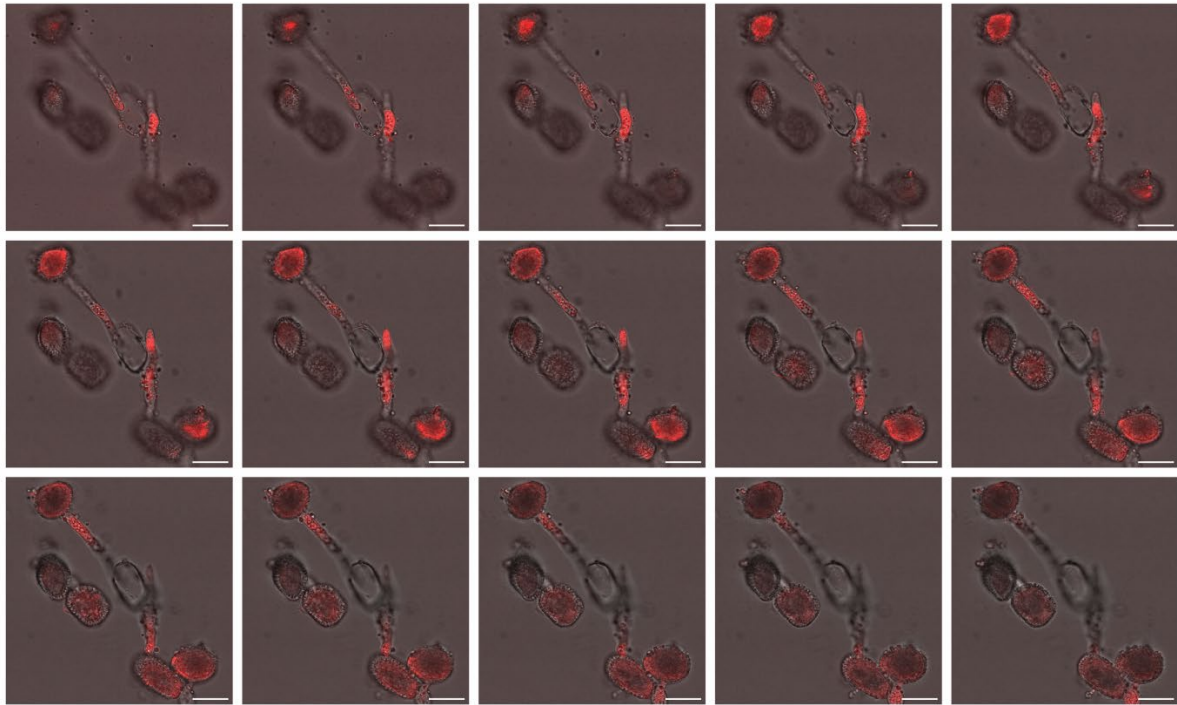

**Figure S2** Selected Cy3 dsRNA\_1 Z stack confocal images. The complete Z stack consisted of 33 images across a depth of 10.65  $\mu\text{m}$ . Images were taken on a Leica Microsystems SP8 system, scale bars correspond to 20  $\mu\text{m}$ .
